# Supplementary material for: On teaching styles of water educators and the impact of didactic training
Source: Copernicus journal article supplement (doi:10.5194/hess-16-3677-2012), 2012-10-17
Supplement: Supplementary file 1 [file Survey2_results.xlsx]

## Sheet: Sheet1
What were the most important things you learned?
	Defining learning objectives	Active learning techniques	Alignment	Assesment	Dealing with heterogeneous groups	Learning styles	Reflecting
The effectiveness of active learning techniques.		X
The importance of making learning objectives clear.	X
Improved approaches for dealing with international groups and diversity.					x
Theory on different learning styles						x
aligned learning - align educational activities to well phrased learning objectives and test assessment on learning objectives			x
Reflecting on lectures							X
More aware about didactics during lecturing		x
Bloom's taxonomy and alignment of teaching activities			X
Learing objectives	X
To better take care of weak students					X
To prepare different exercises for diffferent groups of participants (level of education, short course-MSc student etc)					X
Teaching should be a life long learning process							x
To look at the process of education as an activity students do rather than the lecturer does		X
Learned to give students space to explore and learn themselves -- take care not to unintentionally preempt student innovation.		X
Aligned teaching (Learning objective, assessment, content alignment)			X
To have more confidence in activities I already did (e.g. getting students to teach parts, blended learning techniques).							X
The triangle learning objectives - teaching materials - assessment			x
The confirmation that active learning is the most effective one		X
The fact that there is a lot of material regarding teaching, and that we can always ask the UTQ teachers for advise.							X
UNESCO-IHE has still some way to go in improving their teaching from a didactical point of view.							X
The concept of alignment of learning objectives, teaching activities and assessment (exam)		X
How to make better exams				x
How to activate students better based on learning goals		x
How to create better-structured courses that have a logical buildup (Bloom's taxonomy)			x
designing assesments				x
matching assessment requierements to sylabus				x
The concept of traingular relationship of learning objectives, activities and assessment was very important in revising my modules			x
The development and conduct of problem based learning helped me make changes in my module		x
Student centered approach		x
alignment with assessment				x
To reflect back on my teaching methods and finding ways of improving it							x
To update my lecture material		x
To modify my assessment questions				x
Sistematic approach to the module development.			x
Setting logical sequence of learing objctives.	x
I could have verified my initial larning startegies.
Design learning objectives (LO)	x
Align learning objectives	x
Activate and motivate the students in classroom		x
Prepare a well balance lecture in classroom aligned to the learning objectives			x
Design objective and well balanced examination tools to assess whether the student has met the LO				x
Alignment between learning objectives, methodology and assessment			x
Importance of stating clearly learning objectives	x
Discussions on teaching methods among colleagues							x
	4	8	7	6	3	1	7

## Sheet: Sheet2
What (if any doid you change in your classroom behavior and interaction with students, compared to what you did before you followed the UTQ course?
	Changed teaching style	Increased parcipation in class	Inform student about learning objectives	Adapt assignment for different levels of learning	More own responsibilty for students
Using Anthony Grasha definitions, I have shifted from a purely "expert" approach to a "facilitator".	x
I have increased the active participation of students.		x
I have given more room for discussion during my lectures.		x
setting clear learning objectives and make them explicit to students			x
try to have more time in class to discuss topics and interact with students		x
Offer different levels of teaching to also satisfy advanced students		x
I give learning objectives			x
I use more small interactive exercises	x
I prepare my assignment questions for different levels of learning				x
I let Master students be more responsible in MSc supervision	x
I don't accept work that is of very low scientific quality, but ask for immediate revision					x
Started paying genuine attention to learning objectives. Try to match assessment and content to them.			x
Started (even more than before) involving students actively (e.g. getting them to teach parts.)		x
Started challenging students to explore and find for themselves.					x
I pay much more attention to the learning objectives			x
At the same time I check if the triangle works out	x
Teach and talk less and provide more time for student exercises	x
Change the group work that was already part of my module but is now better embedded and structured	x
Change the exams and the way of assessing the students (better aligned)				x
recapitulation of presented information	x
pausing	x
The UTQ provided useful input on how to modify my teaching in module 10 Water treatment Plants and processes	x
thw UTQ courses helped me change the development of the module that made the students to work on their own					x
teh UTQ course helped me to reasses the learning objective, activities and assessment and make sure the assessments are well balanced to reflet the objectives				x
More relaxed	x
Made students more responsible of own learning					x
More interaction, involvement of students		x
Used more examples and case-studies, arranged students in groups for discussion and presentation	x
Not much. I added more interaction with students during my lecturing.		x
Improved my contact with the students		x
Prepared better balanced lectures as a function of time, contents and LO
Applied better tools and strategies to activate them	x
Make use of more examples and exercises related to practice and real-case scenarios
Improved the way how to get feedback from the students
I slightly modified my learning objectives to make them more clear and to the point			x
I changed my assessment and state clearly in class how the assessment is aligned with the learning objectives				x
	12	8	5	4	4

## Sheet: Sheet3
If_yes,_Has_your_new_way_of_teaching_lead_to_improvements-_for_yourself_and_for_the_students?_(Yes/No)._In_what_way?
														yes	no	partly
Altough the limited number of students and the fact that I have just finalized the UTQ does not allow a proper statistical analysis, my feeling and the feedback questionaaries show that the students appreciate this different approach (less expert, more facilitator). This also seems to be reflected in the examination marks.														x
I changed things and I feel I have improved the delivery of education, though some of the things that changed are not necessarily related to UTQ, for instance I already reflected on my lectures together with some (senior) colleagues and we already experiemented with different forms and levels of education before the UTQ course.																x
Yes, I do less and let the students do more. On the other hand I have to spend more time on preparation. Often I don't really have this time.														x
Probably Yes. Too early to say definitely. However, it is not sure whether there will be an immediate, substantial improvement in student feedback.														x
I would say so. Logic always works better. So, if it is clear for the student what is to be learnt, and he or she is also examined for that, it only makes sense. What did not change is the way I teach in face to face class. I was already teaching in an interactive way, and I feel more supported in continuing with that. A few items I learnt fro a specific course in the UTQ process (Individual Stud…														x
This is difficult to say. We do not evaluate our teaching and our modules in such a way that this can be measured. I am still not completely happy with the module and will probably keep changing things based on the most recent experiences. I think we need better ways of evaluating our modules though.																x
The administrative aspects of teaching (designig well structured sylabus adn assessments) have improved since UTQ.																x
I believe the course has helped me in how best to develop course. It helped me to revisit the module descriptions and will definitely help me in developing new courses.														x
Yes, in improving lecture material and in teaching methods														x
Not much.I already have rather good evaluation of my teaching.															x
Yes, based on what has been described previously, I felt more confortable and enthusiastic in the classroom. Concerning the students, most of them got very good marks (higher than in previous years despite that the exam was more difficult) confirming that they met the LO. Furthermore, it also strengthen my personal relationship with them who continue to approach me for advice in the execution of …														x
The changes in learning objectives and assessment helped me in having a more structured course. I am not sure whether students find these changes useful. I am afraid that many of them are used to have very different sort of classes: top down sort of lectures without any information on learning objectives and the way assessment is connected to them. Thus, I am not sure whether they appreciate the …																x

## Sheet: Sheet4
If_nothing_substantially_changed,_why_not?
Because I was already applying the methods that were thought during the course before
UTQ is good and useful though could be improved if theories would be made more practical and if more (critical/constructive) feedback would be given by peers and UTQ lecturers on performance. Also not all what was discussed in UTQ was relevant for IHE context while things that are very useful for us (e.g. large variety of students in class -academic background, level, culture, age-, limited time …
Lack of time; no follow-up for UTQ; still partly confusing about UTQ programme contents
Only negative part is not having enough time to modify my lecture material the way I think it should be modified (with the UTQ concepts0
I did not change my way of teaching, since it was positively commented by students, colleagues who attended my classes and the UTQ teacher.

## Sheet: Sheet5
We are interested in knowing your experiences during UTQ and in the class (both before and after UTQ( that are relevant to didactics.
As mentioned, the main outcome of the UTQ process is that I have moved from a more expert approach, to a facilitator one, by referring to Anthony Grasha definitions. In particular, I am increasing the interactions with my students, and seeking for a continuous productive feedback. My final objective is to enhance the capability of my students to independently deal with unconventional problems. To…
The feedback that I received during UTQ on didactics was in general positive though I learnt to be more aware of what happens in class when I lecture, so I am less focused on finishing my lecture and interact more with students. My body language has improved and I try to create a personal sphere in class where students feel at ease to ask questions. I also learnt to better balance theory and prac…
Can't tell. I think someone else should evaluate me...Teaching is learning by doing anyway. A lot comesw with experience...
Same as 2 questions before: - the triangle learning objectives - teaching materials - assessment - it is important to talk about expectations at the beginning of a supervision trajectory, that you allow the student to take responsibility, and that you assess the student according to objective criteria, announced at the beginning of the trajectory.
For me the most important change is building in more student activating moments into my lectures, ie I think more actively about how I can let them struggle with the material for 3-5 minutes, a few times during lectures. I have also built in more exercises during which they work in groups and learn about the material like that, without me lecturing about it.
The objective of the UTQ course was not made clear to me when I started. I struggled until the middle of the course to understand the expectations from the instructors and myself. Evey time we had a meeting with the group, everyone seemed not to know how to start and what to do. This was a weakness from the side of the instructors, I would say. A lot of material was provided, which I did not use …
My teaching style before the UTQ was also very interactive (I believe). After the UTQ I am more into arranging discussion sessions and letting the students present what they have learnt - it's good learning process for me as well.
The approach during UTQ was highly participatory, mostly by sharing experiences. I keep my lecturing as conventional but offer lots of materials and exercises where people can work in groups. Self study seems to be useful because I receive limited number of questions from my students.
As mentioned above, the UTQ course and portfolio writing was useful for me to better understand and self assess my way of teaching. I doubt that we can apply in practice what we discussed with the UTQ teacher, since our students do come from very different cultures where the relationship between lecturer and student is very different. In terms of didactic, i did not find any relevant information …

## Sheet: Sheet6
Any_other_remarks?_Please_specify_them_here.
My teaching style contained a bit of all before and after the UTQ course
I believe UTQ should not remain a course but should be mainstreamed within IHE e.g. self reflection reports on modules/lectures should become normal practice, peer-to-peer an external reviews should be introduced on regular basis, style of learning objectives should be examined across programmes/specializations/modules, and regular refresher courses to update us on educational theories should be …
You always ask us to judge ourselves. Perhaps I have very low or very high self-confidence and judge myself accordingly extreme, but not necessarly realistically? Is this a representative survey, if I judge myself??? Better ask others to judge me!!!
I am much more aware now of the fact that teaching should be primarily about what students learn and much less about what I teach. I can teach as much as I like but if this does not lead to learning, then it is all in vain. At least now I am thinking about this much more, and trying to change my teaching accordingly. Whether or not this is successful is something I do not know, but for IHE it is …
In January 2009 I had the opportunity to follow a different UTQ. I was quite surprised that this new UTQ course needed several weeks/months to elaborate on the same subjects which were given in January 2009 in the course of 3 days.Personally I found the pace low, the tutors not extremelly motivating. However one of the most appreciated aspects of this UTQ course was the possibility it provided to…
I believe, the UTQ course is very useful, however, a follow up discussion and possible implementation of the learned should be made. A lot of what I wrote in the portfolio was how I do my preparation and conduct my teaching. Emphasis should be made on how to improve or change and a follow up.
The UTQ helped me more in the module design process rather than in its implementation. Furthermore,I would have liked to have more guidance on teaching in internationl set-up (to possibly adapt my learning style)
